# Supplementary material for: Optimal Raman-scattering signal for estimating the Fe3+ content on the clinozoisite–epidote join
Source: Copernicus journal article supplement (doi:10.5194/ejm-35-267-2023), 2023-04-06
Supplement: Supplementary file 1 [file ejm-35-267-2023-supplement.zip]

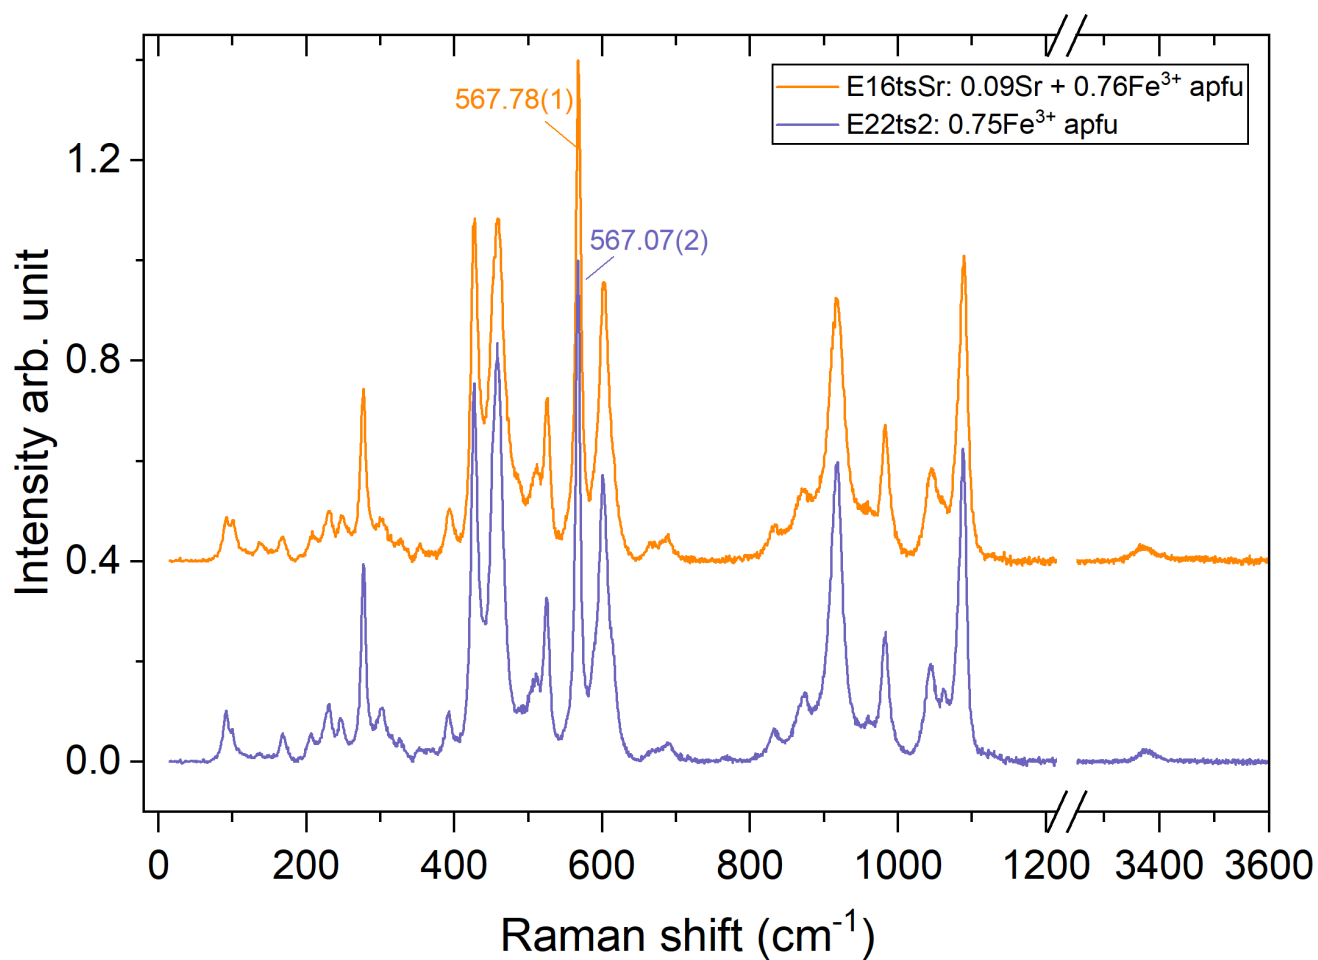

**Figure S1.** Raman spectra of E16tsSr (0.09 Sr apfu) and E22ts2. The Fe contents in E16tsSr and E22ts2 are very similar, 0.76 and 0.75  $\text{Fe}^{3+}$  apfu, respectively.
