# Supplementary material for: Optimal Raman-scattering signal for estimating the Fe3+ content on the clinozoisite–epidote join
Source: Copernicus journal article supplement (doi:10.5194/ejm-35-267-2023), 2023-04-06
Supplement: Supplementary file 2 [file ejm-35-267-2023-supplement.zip]

**Table S1.** Previously reported peaks and the peak assignments of infrared spectra of the Al-Fe<sup>3+</sup> series of epidote.

| Peak no. <sup>a</sup> | Refere<br>nce | Observed peaks          |        |         |        |        |      |                                       |      |                              |                        |                                  |                             |                      | Peak assignments              |                                           |                              |                                     |                                  |                          |
|-----------------------|---------------|-------------------------|--------|---------|--------|--------|------|---------------------------------------|------|------------------------------|------------------------|----------------------------------|-----------------------------|----------------------|-------------------------------|-------------------------------------------|------------------------------|-------------------------------------|----------------------------------|--------------------------|
|                       |               | Langer and Raith (1974) |        |         |        |        |      | Petrusenko et al. (1992) <sup>b</sup> |      | Bradbury and Williams (2003) | Makreski et al. (2007) | White et al. (2017) <sup>d</sup> | Su et al. (2019)            | Zheira et al. (2022) | Langer and Raith (1974)       | Petrusenko et al. (1992) <sup>b</sup>     | Bradbury and Williams (2003) | Makreski et al. (2007) <sup>c</sup> | White et al. (2017) <sup>d</sup> | Su et al. (2019)         |
|                       |               | Sample                  | PF39   | HU252   | HU215  | Wi51   | Ep T | Ep                                    | Czo  | Nightengale, US              | Dunje, Macedonia       | NICOD OM <sup>c</sup>            | Hamersley Basin, Austrarlia | Madagas car          |                               |                                           |                              |                                     |                                  |                          |
|                       | Fe (apfu)     | 0                       | 0.29   | 0.44    | 0.68   | 0.89   | -    | -                                     | 0.46 | -                            | -                      | 0.3-0.9                          | 0.8                         | 0.89-1.07            |                               |                                           |                              |                                     |                                  |                          |
|                       |               |                         |        |         |        |        |      |                                       |      |                              |                        | ca. 6450                         |                             |                      |                               |                                           |                              |                                     | 2v(OH)                           |                          |
|                       |               |                         |        |         |        |        |      |                                       |      |                              |                        |                                  | 3762                        |                      |                               |                                           |                              |                                     |                                  | O-H                      |
|                       |               |                         |        |         |        |        |      |                                       |      |                              |                        |                                  | 3360                        |                      |                               |                                           |                              |                                     |                                  | O-H                      |
|                       |               |                         |        |         |        |        |      |                                       |      |                              |                        |                                  | 3641                        |                      |                               |                                           |                              |                                     |                                  | O-H                      |
|                       |               |                         |        |         |        |        |      |                                       |      |                              |                        |                                  | 3397                        |                      |                               |                                           |                              |                                     |                                  | O-H                      |
| 1                     |               | 3326                    | 3338   | 3345    | 3360   | 3365   | 3380 | 3370                                  | 3351 | 3362s                        | 3360s                  | 3360-3375                        | 3357                        | 3379vs               | v(OH)                         | v(OH)                                     | v(OH)                        | v(OH)                               | v(OH)                            | O-H                      |
| 2                     |               | 1143                    | 1126   | 1120    | 1110   | 1108   | 1118 | 1120                                  | 1121 | 1113m                        | 1115m                  |                                  |                             | 1103w                | v(Si-O)                       | v(Si-O) of Si <sub>2</sub> O <sub>7</sub> | v3-SiO <sub>4</sub>          | v(Si-O <sub>nb</sub> )              |                                  |                          |
| 3                     |               | 1116                    | 1106   | 1100wsh |        |        |      |                                       |      |                              |                        |                                  |                             |                      | v(Si-O)                       |                                           |                              |                                     |                                  |                          |
| 4                     |               |                         |        | 1090wsh | 1079   | 1076   | 1080 | 1080                                  |      | 1076m                        | 1075m                  |                                  |                             | 1076m                | v(Si-O)                       | v(Si-O) of SiO <sub>4</sub>               |                              | v(Si-O <sub>nb</sub> )              |                                  |                          |
| 5                     |               | 1047                    | 1043   | 1039    | 1037   | 1035   | 1040 | 1045                                  | 1042 | 1038m                        | 1036m                  |                                  |                             | 1034m                | v(Si-O)                       | δ(OH)                                     | v3-SiO <sub>4</sub>          | v(Si-O <sub>nb</sub> ) + δ(OH)      |                                  |                          |
| 6                     |               | 980sh                   | 973wsh | 977wsh  | 980wsh | 975sh  |      |                                       |      | 970sh                        | 970sh                  |                                  |                             |                      |                               |                                           |                              | antisym. v(Si-O <sub>nb</sub> )     |                                  |                          |
| 7                     |               | 950                     | 954    | 952     | 953    | 951    | 960  | 960                                   | 963  | 953vs                        | 952vs                  |                                  |                             | 949vs                | v(Si-O)                       | v(Si-O) of SiO <sub>4</sub>               | v3-SiO <sub>4</sub>          | antisym. v(Si-O <sub>nb</sub> )     |                                  |                          |
| 8                     |               | 906                     | 910wsh | 905wsh  | 910wsh | 900wsh |      |                                       |      | 901sh                        | 900sh                  |                                  |                             | 903wsh               | δ(OH)                         |                                           |                              | δ(OH)                               |                                  |                          |
| 9                     |               | 895                     | 892    | 889     | 889    | 886    | 890  | 890                                   | 888  | 888s                         | 885s                   |                                  | 878                         | 879s                 | v(Si-O)                       | v(Si-O) of SiO <sub>4</sub>               | v1-SiO <sub>4</sub>          | v(Si-O <sub>nb</sub> )              |                                  | Si-O                     |
| 10                    |               | 869                     | 865 sh | 865 sh  | 862 sh | 861    |      |                                       | 859  | 854vw                        | 855vw                  |                                  |                             | 856wsh               |                               |                                           | v1(?)–SiO <sub>4</sub>       | v(Si-O <sub>nb</sub> )              |                                  |                          |
| 11                    |               | 849                     | 843    | 843     | 840    | 836    | 840  | 850                                   | 841  | 831w                         | 832vw                  |                                  |                             | 833w                 | v(Si-O)                       | v(Si-O) of SiO <sub>4</sub>               | v1(?)–SiO <sub>4</sub>       | v(Si-O <sub>nb</sub> )              |                                  |                          |
| 12                    |               |                         | 805    | 800wsh  | 802wsh | 800wsh |      |                                       |      |                              |                        |                                  |                             | 798m                 |                               |                                           |                              |                                     |                                  |                          |
| 13                    |               | 741                     | 733    | 731     | 723    | 718    |      |                                       |      | 722w                         | 722w                   |                                  |                             | 714w                 |                               |                                           |                              | v(M-O)                              |                                  |                          |
| 14                    |               | 690sh                   | 695wsh | 697wsh  | 697wsh | 697wsh |      |                                       |      |                              |                        |                                  |                             | 694wsh               |                               |                                           |                              |                                     |                                  |                          |
| 15                    |               | 676                     | 670    | 668sh   | 673wsh | 670wsh |      | 670                                   | 679  | 673sh, br                    | 673sh, br              |                                  |                             | 679sh                | v(Si-O)                       | OH libration?<br>v(M-O) or δ(Si-O)        | δ(Si-O <sub>b</sub> -Si)     | δ(Si-O <sub>b</sub> -Si)            | δ(Si-O <sub>b</sub> -Si)         | δ(Si-O <sub>b</sub> -Si) |
| 16                    |               | 650                     | 649    | 648     | 649    | 648    | 650  | 650                                   | 660  | 646s                         | 650vs                  |                                  |                             | 648s                 |                               |                                           |                              |                                     |                                  |                          |
| 17                    |               | 603                     | 599    | 596sh   | 590wsh | 585wsh |      |                                       |      | 594sh                        | 595sh                  |                                  |                             | 586sh                |                               |                                           |                              |                                     |                                  |                          |
| 18                    |               | 575                     | 575    | 571     |        |        | 570  | 570                                   |      |                              |                        |                                  |                             |                      |                               |                                           |                              |                                     |                                  |                          |
| 19                    |               | 561                     | 558    | 557     | 568    | 563    |      |                                       |      | 569w                         | 570sh, br              |                                  |                             | 559w                 |                               |                                           |                              |                                     |                                  |                          |
| 20                    |               | 527                     | 544wsh | 541     | 530wsh |        |      |                                       |      | 539sh, br                    |                        |                                  |                             | 540vw                |                               |                                           |                              |                                     |                                  |                          |
| 21                    |               |                         | 517    | 518     | 519    | 517    | 520  | 530                                   |      | 516s                         | 520s                   |                                  |                             | 513s                 |                               |                                           |                              |                                     |                                  |                          |
| 22                    |               | 498                     | 495wsh | 495wsh  |        |        |      |                                       |      |                              |                        |                                  |                             |                      |                               |                                           |                              |                                     |                                  |                          |
| 23                    |               | 487                     | 477    | 474     | 467    | 460sh  |      | 470                                   |      | 469sh                        |                        |                                  |                             | 462vw                |                               |                                           |                              |                                     |                                  |                          |
| 24                    |               | 457                     | 457    | 457     | 457    | 454    | 460  | 460                                   |      | 454m                         | 455m                   |                                  |                             | 455m                 |                               |                                           |                              |                                     |                                  |                          |
| 25                    |               |                         | 430wsh | 430wsh  | 430wsh | 410wsh |      |                                       |      | 411sh                        |                        |                                  |                             |                      | δ(O-Si-O), δ(Si-O-Si), v(M-O) |                                           |                              | v(M-O)                              | δ(Si-O <sub>b</sub> -Si)         | v(M-O)                   |
| 26                    |               | 419                     | 411    | 408     | 400    | 395    | 420  | 415                                   |      | 398s                         |                        |                                  |                             |                      |                               |                                           |                              |                                     |                                  |                          |
| 27                    |               | 393                     | 389    | 387     | 385sh  | 381    |      |                                       |      | 389sh                        |                        |                                  |                             |                      |                               |                                           |                              |                                     |                                  |                          |
| 28                    |               | 363                     | 360    | 359     | 355    | 351    |      |                                       |      | 371vw                        |                        |                                  |                             |                      |                               |                                           |                              |                                     |                                  |                          |
| 29                    |               | 344                     | 345sh  | 346wsh  |        |        |      |                                       |      |                              |                        |                                  |                             |                      |                               |                                           |                              |                                     |                                  |                          |
| 30                    |               | 336sh                   | 338    | 331sh   |        |        |      |                                       |      |                              |                        |                                  |                             |                      |                               |                                           |                              |                                     |                                  |                          |
| 31                    |               | 320wsh                  | 314    | 312     |        | 313    |      |                                       |      |                              |                        |                                  |                             |                      |                               |                                           |                              |                                     |                                  |                          |
| 32                    |               | 305                     | 299    | 295     | 300    | 297    |      |                                       |      |                              |                        |                                  |                             |                      |                               |                                           |                              |                                     |                                  |                          |
| 33                    |               |                         |        |         | 289    | 284    |      |                                       |      |                              |                        |                                  |                             |                      |                               |                                           |                              |                                     |                                  |                          |
| 34                    |               | 274                     | 268    | 265     | 260    | 256    |      |                                       |      |                              |                        |                                  |                             |                      |                               |                                           |                              |                                     |                                  |                          |

<sup>a</sup> Adopted by Langer and Raith (1974).<sup>b</sup> The OD stretching and libration modes are 2490 and 780 cm<sup>-1</sup>, respectively.<sup>c</sup> Frequencies and intensities are approximate because are not specified (Makreski et al., 2007).<sup>d</sup> Result of short wave infrared spectroscopy.<sup>e</sup> As the tentative assignments (Makreski et al., 2007).

Note : s: strong, w: weak, m: medium, sh: shoulder, v: very, br: broad, nb: non-bridging, b: bridging
