# Supplementary material for: Optimal Raman-scattering signal for estimating the Fe3+ content on the clinozoisite–epidote join
Source: Copernicus journal article supplement (doi:10.5194/ejm-35-267-2023), 2023-04-06
Supplement: Supplementary file 3 [file ejm-35-267-2023-supplement.zip]

**Table S2.** Chemical compositions of epidote group minerals.

|                                             | C2    |       |       | C3           | E5           |              |              | C6           |              |              | E7           |              |              | E8           | E9           | C10          |              |              | E11          | C13          |              |
|---------------------------------------------|-------|-------|-------|--------------|--------------|--------------|--------------|--------------|--------------|--------------|--------------|--------------|--------------|--------------|--------------|--------------|--------------|--------------|--------------|--------------|--------------|
|                                             | ts1   | ts2   | ts3   | ts1          | ts1          | ts2          | ts3          | ts1          | ts2          | ts3          | ts1          | ts2          | ts3          | ts2          | ts1          | ts1          | ts2          | ts3          | ts1          | ts1          | ts2          |
|                                             |       |       |       | <i>n</i> = 3 |
| SiO <sub>2</sub>                            | 38.92 | 38.22 | 38.86 | 39.16        | 36.74        | 37.11        | 37.42        | 38.43        | 38.21        | 37.89        | 37.51        | 37.38        | 37.60        | 38.18        | 37.21        | 38.42        | 38.56        | 39.01        | 37.46        | 37.83        | 38.34        |
| TiO <sub>2</sub>                            | 0.00  | 0.00  | 0.00  | 0.14         | 0.04         | 0.11         | 0.02         | 0.07         | 0.06         | 0.08         | 0.08         | 0.27         | 0.06         | 0.08         | 0.02         | 0.03         | 0.10         | 0.12         | 0.09         | 0.09         | 0.03         |
| Al <sub>2</sub> O <sub>3</sub>              | 28.40 | 26.93 | 29.15 | 29.44        | 18.89        | 20.14        | 20.31        | 27.46        | 28.18        | 27.40        | 24.16        | 23.38        | 23.29        | 24.59        | 21.46        | 27.23        | 28.99        | 29.55        | 21.61        | 26.38        | 25.68        |
| V <sub>2</sub> O <sub>3</sub> <sup>a</sup>  | 0.04  | 0.06  | 0.00  | 0.02         | 0.07         | 0.05         | 0.04         | 0.02         | 0.02         | 0.02         | 0.08         | 0.13         | 0.09         | 0.07         | 0.02         | 0.01         | 0.01         | 0.01         | 0.02         | 0.01         | 0.03         |
| Fe <sub>2</sub> O <sub>3</sub> <sup>a</sup> | 6.21  | 8.54  | 5.10  | 5.10         | 18.38        | 17.00        | 16.70        | 7.06         | 6.24         | 6.96         | 11.43        | 12.50        | 13.22        | 11.52        | 15.41        | 7.81         | 5.02         | 4.15         | 15.31        | 8.43         | 9.09         |
| Mn <sub>2</sub> O <sub>3</sub> <sup>a</sup> | 0.11  | 0.34  | 0.10  | 0.19         | 0.24         | 0.09         | 0.16         | 0.15         | 0.19         | 0.22         | 0.12         | 0.19         | 0.19         | 0.32         | 0.04         | 0.02         | 0.17         | 0.25         | 0.11         | 0.40         | 0.39         |
| MgO                                         | 0.09  | 0.01  | 0.03  | 0.07         | 0.01         | 0.01         | 0.00         | 0.06         | 0.07         | 0.05         | 0.01         | 0.02         | 0.02         | 0.06         | 0.01         | 0.05         | 0.06         | 0.07         | 0.01         | 0.05         | 0.06         |
| CaO                                         | 24.24 | 23.69 | 24.15 | 24.26        | 23.27        | 23.62        | 23.34        | 24.34        | 24.42        | 24.28        | 23.87        | 23.75        | 23.56        | 23.67        | 23.31        | 24.05        | 24.31        | 24.39        | 23.08        | 23.47        | 23.66        |
| SrO                                         | 0.00  | 0.00  | 0.00  | 0.00         | 0.38         | 0.20         | 0.42         | 0.01         | 0.00         | 0.00         | 0.07         | 0.06         | 0.28         | 0.03         | 0.20         | 0.74         | 0.07         | 0.03         | 0.47         | 0.10         | 0.55         |
| Na <sub>2</sub> O                           | 0.03  | 0.01  | 0.03  | 0.01         | 0.03         | 0.02         | 0.02         | 0.01         | 0.02         | 0.02         | 0.02         | 0.03         | 0.04         | 0.01         | 0.01         | 0.02         | 0.03         | 0.01         | 0.01         | 0.01         | 0.01         |
| F                                           | 0.38  | 0.38  | 0.37  | 0.39         | 0.17         | 0.34         | 0.28         | 0.39         | 0.46         | 0.35         | 0.31         | 0.28         | 0.28         | 0.36         | 0.31         | 0.39         | 0.41         | 0.46         | 0.35         | 0.07         | 0.29         |
| Cl                                          | 0.01  | 0.00  | 0.00  | 0.00         | 0.00         | 0.01         | 0.00         | 0.00         | 0.00         | 0.00         | 0.00         | 0.00         | 0.00         | 0.00         | 0.00         | 0.00         | 0.00         | 0.00         | 0.00         | 0.00         | 0.00         |
| O ≡ F, Cl                                   | -0.16 | -0.16 | -0.16 | -0.16        | -0.07        | -0.15        | -0.12        | -0.16        | -0.19        | -0.15        | -0.13        | -0.12        | -0.12        | -0.15        | -0.13        | -0.16        | -0.17        | -0.19        | -0.15        | -0.03        | -0.12        |
| Total                                       | 98.27 | 98.02 | 97.63 | 98.62        | 98.15        | 98.55        | 98.59        | 97.84        | 97.68        | 97.12        | 97.53        | 97.87        | 98.51        | 98.74        | 97.87        | 98.61        | 97.56        | 97.86        | 98.37        | 96.81        | 98.01        |
| ΣCations =                                  | 8     | 8     | 8     | 8            | 8            | 8            | 8            | 8            | 8            | 8            | 8            | 8            | 8            | 8            | 8            | 8            | 8            | 8            | 8            | 8            | 8            |
| Si                                          | 3.01  | 2.99  | 3.02  | 3.01         | 2.99         | 2.99         | 3.01         | 3.00         | 2.98         | 2.98         | 2.99         | 2.98         | 2.99         | 3.00         | 3.00         | 2.99         | 3.00         | 3.01         | 3.00         | 3.00         | 3.02         |
| Ti                                          | 0.00  | 0.00  | 0.00  | 0.01         | 0.00         | 0.01         | 0.00         | 0.00         | 0.00         | 0.01         | 0.00         | 0.02         | 0.00         | 0.01         | 0.00         | 0.00         | 0.01         | 0.01         | 0.01         | 0.01         | 0.00         |
| Al                                          | 2.59  | 2.49  | 2.66  | 2.67         | 1.81         | 1.91         | 1.94         | 2.53         | 2.59         | 2.54         | 2.27         | 2.20         | 2.18         | 2.28         | 2.04         | 2.50         | 2.66         | 2.69         | 2.04         | 2.47         | 2.38         |
| V <sup>3+</sup>                             | 0.00  | 0.00  | 0.00  | 0.00         | 0.00         | 0.00         | 0.00         | 0.00         | 0.00         | 0.00         | 0.01         | 0.01         | 0.01         | 0.00         | 0.00         | 0.00         | 0.00         | 0.00         | 0.00         | 0.00         | 0.00         |
| Fe <sup>3+</sup>                            | 0.36  | 0.50  | 0.30  | 0.29         | 1.13         | 1.03         | 1.01         | 0.41         | 0.37         | 0.41         | 0.68         | 0.75         | 0.79         | 0.68         | 0.94         | 0.46         | 0.29         | 0.24         | 0.93         | 0.50         | 0.54         |
| Mn                                          | 0.01  | 0.02  | 0.01  | 0.01         | 0.02         | 0.01         | 0.01         | 0.01         | 0.01         | 0.01         | 0.01         | 0.01         | 0.01         | 0.02         | 0.00         | 0.00         | 0.01         | 0.02         | 0.01         | 0.02         | 0.02         |
| Mg                                          | 0.01  | 0.00  | 0.00  | 0.01         | 0.00         | 0.00         | 0.00         | 0.01         | 0.01         | 0.01         | 0.00         | 0.00         | 0.00         | 0.01         | 0.00         | 0.01         | 0.01         | 0.01         | 0.00         | 0.01         | 0.01         |
| Ca                                          | 2.01  | 2.00  | 2.01  | 2.00         | 2.03         | 2.04         | 2.01         | 2.04         | 2.04         | 2.04         | 2.04         | 2.03         | 2.00         | 2.00         | 2.01         | 2.01         | 2.02         | 2.02         | 1.99         | 1.99         | 2.00         |
| Sr                                          | 0.00  | 0.00  | 0.00  | 0.00         | 0.02         | 0.01         | 0.02         | 0.00         | 0.00         | 0.00         | 0.00         | 0.00         | 0.01         | 0.00         | 0.01         | 0.03         | 0.00         | 0.00         | 0.02         | 0.00         | 0.03         |
| Na                                          | 0.01  | 0.00  | 0.00  | 0.00         | 0.00         | 0.00         | 0.00         | 0.00         | 0.00         | 0.00         | 0.00         | 0.00         | 0.01         | 0.00         | 0.00         | 0.00         | 0.00         | 0.00         | 0.00         | 0.00         | 0.00         |
| Total                                       | 8.00  | 8.00  | 8.00  | 8.00         | 8.00         | 8.00         | 8.00         | 8.00         | 8.00         | 8.00         | 8.00         | 8.00         | 8.00         | 8.00         | 8.00         | 8.00         | 8.00         | 8.00         | 8.00         | 8.00         | 8.00         |
| F                                           | 0.09  | 0.09  | 0.09  | 0.09         | 0.04         | 0.09         | 0.07         | 0.10         | 0.11         | 0.09         | 0.08         | 0.07         | 0.07         | 0.09         | 0.08         | 0.10         | 0.10         | 0.11         | 0.09         | 0.02         | 0.07         |
| Cl                                          | 0.00  | 0.00  | 0.00  | 0.00         | 0.00         | 0.00         | 0.00         | 0.00         | 0.00         | 0.00         | 0.00         | 0.00         | 0.00         | 0.00         | 0.00         | 0.00         | 0.00         | 0.00         | 0.00         | 0.00         | 0.00         |

<sup>a</sup> V as V<sub>2</sub>O<sub>3</sub>, Fe as Fe<sub>2</sub>O<sub>3</sub> and Mn as Mn<sub>2</sub>O<sub>3</sub>.
