# Supplementary material for: Optimal Raman-scattering signal for estimating the Fe3+ content on the clinozoisite–epidote join
Source: Copernicus journal article supplement (doi:10.5194/ejm-35-267-2023), 2023-04-06
Supplement: Supplementary file 4 [file ejm-35-267-2023-supplement.zip]

**Table S3.** Chemical compositions of Sr-bearing epidotes.

|                                             | E16tsSr      | E17tsSr      | CrE14Sr1 | CrE14Sr2 |
|---------------------------------------------|--------------|--------------|----------|----------|
|                                             | <i>n</i> = 3 | <i>n</i> = 3 |          |          |
| SiO <sub>2</sub>                            | 37.70        | 36.72        | 37.23    | 37.37    |
| TiO <sub>2</sub>                            | 0.02         | 0.10         | 0.15     | 0.02     |
| Al <sub>2</sub> O <sub>3</sub>              | 23.59        | 19.69        | 25.23    | 25.02    |
| Cr <sub>2</sub> O <sub>3</sub> <sup>a</sup> | 0.01         | 0.00         | 3.85     | 2.60     |
| V <sub>2</sub> O <sub>3</sub> <sup>a</sup>  | 0.01         | 0.03         | 0.00     | 0.01     |
| Fe <sub>2</sub> O <sub>3</sub> <sup>a</sup> | 12.68        | 17.85        | 6.01     | 8.00     |
| Mn <sub>2</sub> O <sub>3</sub> <sup>a</sup> | 0.17         | 0.03         | 0.09     | 0.10     |
| NiO                                         | 0.00         | 0.00         | 0.05     | 0.02     |
| MgO                                         | 0.03         | 0.00         | 0.09     | 0.04     |
| CaO                                         | 22.26        | 21.53        | 21.90    | 21.76    |
| SrO                                         | 1.98         | 2.44         | 2.63     | 2.93     |
| BaO                                         | 0.02         | 0.04         | 0.00     | 0.01     |
| Na <sub>2</sub> O                           | 0.03         | 0.00         | 0.03     | 0.01     |
| K <sub>2</sub> O                            | 0.02         | 0.00         | 0.04     | 0.01     |
| P <sub>2</sub> O <sub>5</sub>               | 0.02         | 0.03         | 0.01     | 0.01     |
| PbO                                         | 0.04         | 0.01         | 0.00     | 0.00     |
| F                                           | 0.17         | 0.06         | 0.13     | 0.07     |
| Cl                                          | 0.00         | 0.00         | 0.01     | 0.00     |
| O $\equiv$ F, Cl                            | -0.07        | -0.03        | -0.06    | -0.03    |
| Total                                       | 98.68        | 98.49        | 97.39    | 97.95    |
| $\Sigma$ Cations =                          | 8            | 8            | 8        | 8        |
| Si                                          | 3.00         | 3.00         | 2.98     | 2.98     |
| Ti                                          | 0.00         | 0.01         | 0.01     | 0.00     |
| Al                                          | 2.22         | 1.89         | 2.38     | 2.36     |
| Cr <sup>3+</sup>                            | 0.00         | 0.00         | 0.24     | 0.16     |
| V <sup>3+</sup>                             | 0.00         | 0.00         | 0.00     | 0.00     |
| Fe <sup>3+</sup>                            | 0.76         | 1.10         | 0.36     | 0.48     |
| Mn                                          | 0.01         | 0.00         | 0.01     | 0.01     |
| Ni                                          | 0.00         | 0.00         | 0.00     | 0.00     |
| Mg                                          | 0.00         | 0.00         | 0.01     | 0.00     |
| Ca                                          | 1.90         | 1.88         | 1.88     | 1.86     |
| Sr                                          | 0.09         | 0.12         | 0.12     | 0.14     |
| Ba                                          | 0.00         | 0.00         | 0.00     | 0.00     |
| Na                                          | 0.00         | 0.00         | 0.00     | 0.00     |
| K                                           | 0.00         | 0.00         | 0.00     | 0.00     |
| P                                           | 0.00         | 0.00         | 0.00     | 0.00     |
| Pb                                          | 0.00         | 0.00         | 0.00     | 0.00     |
| Total                                       | 8.00         | 8.00         | 8.00     | 8.00     |
| F                                           | 0.04         | 0.02         | 0.03     | 0.02     |
| Cl                                          | 0.00         | 0.00         | 0.00     | 0.00     |

<sup>a</sup>Cr as Cr<sub>2</sub>O<sub>3</sub>, V as V<sub>2</sub>O<sub>3</sub>, Fe as Fe<sub>2</sub>O<sub>3</sub> and Mn as Mn<sub>2</sub>O<sub>3</sub>.
