# Supplementary material for: Optimal Raman-scattering signal for estimating the Fe3+ content on the clinozoisite–epidote join
Source: Copernicus journal article supplement (doi:10.5194/ejm-35-267-2023), 2023-04-06
Supplement: Supplementary file 5 [file ejm-35-267-2023-supplement.zip]

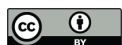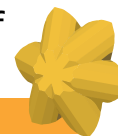

*Supplement of*

**Optimal Raman-scattering signal for estimating the  $\text{Fe}^{3+}$  content on the clinozoisite–epidote join**

**Mariko Nagashima and Boriana Mihailova**

*Correspondence to:* Mariko Nagashima ([nagashim@yamaguchi-u.ac.jp](mailto:nagashim@yamaguchi-u.ac.jp))

- [ejm-35-267-2023-supplement-title-page.pdf](#)
- [FS1.pdf](#)
- [TS1.pdf](#)
- [TS2.pdf](#)
- [TS3.pdf](#)

The copyright of individual parts of the supplement might differ from the article licence.
